# Supplementary material for: A tandem effect of atomically isolated copper–nitrogen sites and copper clusters enhances CO2electroreduction to ethylene
Source: Royal Society of Chemistry journal article supplement (doi:10.1039/d2nr06009d), 2022-12-12
Supplement: d2nr06009d1.pdf [file d2nr06009d1.pdf]

## Tandem Effect of Atomically Isolated Copper–Nitrogen Sites and Copper Clusters Enhances CO<sub>2</sub> Electroreduction to Ethylene

Ying Zhang,\*<sup>a,1</sup> Jianing Gui,<sup>a,1</sup> Dan Wang,<sup>a</sup> Junjun Mao,<sup>a</sup> Chenchen Zhang<sup>a</sup> and Fengwang Li\*<sup>b</sup>

a. Key Laboratory of Synthetic and Biological Colloids Ministry of Education, School of Chemical and Material Engineering, Jiangnan University, Wuxi 214122, China

b. School of Chemical and Biomolecular Engineering, the University of Sydney, NSW 2006, Australia.

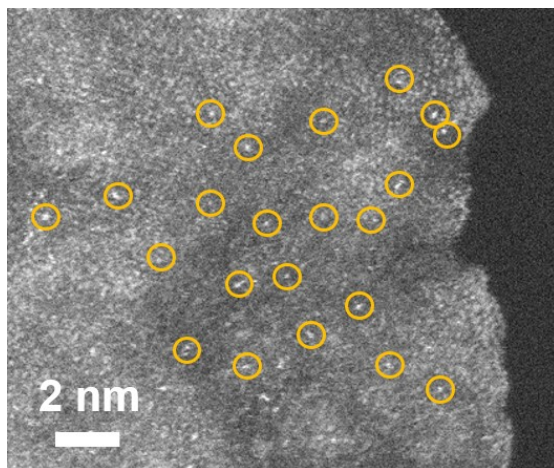

Figure S1. STEM image of PDI-Cu

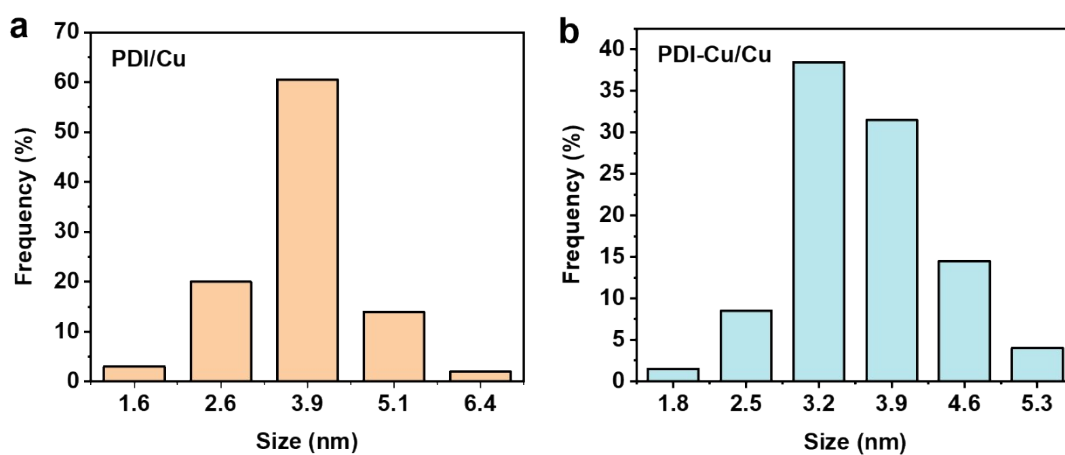

Figure S2. size distribution of Cu clusters on (a) PDI/Cu and (b) PDI-Cu/Cu.

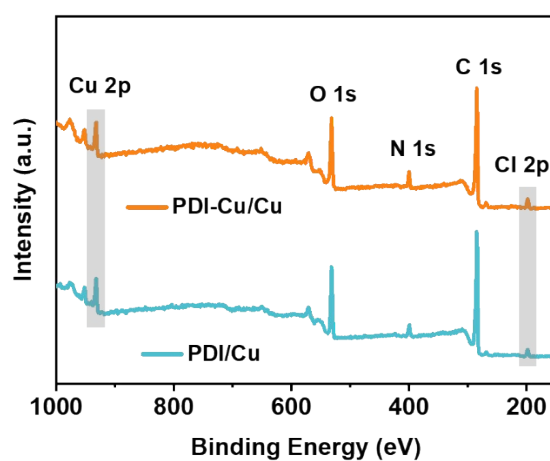

Figure S3. The full XPS survey spectra.

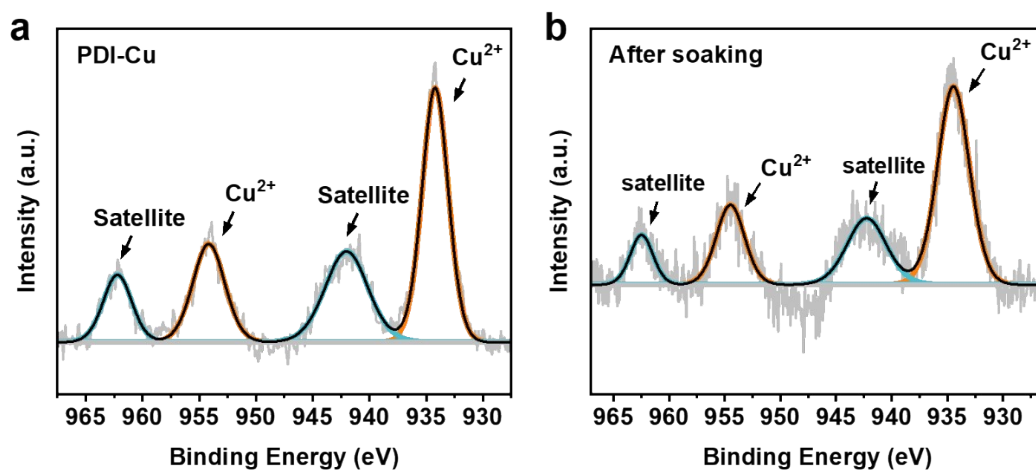

Figure S4. Cu 2p XPS spectra of (a) PDI-Cu and (b) PDI-Cu after soaking *L*-ascorbic acid.

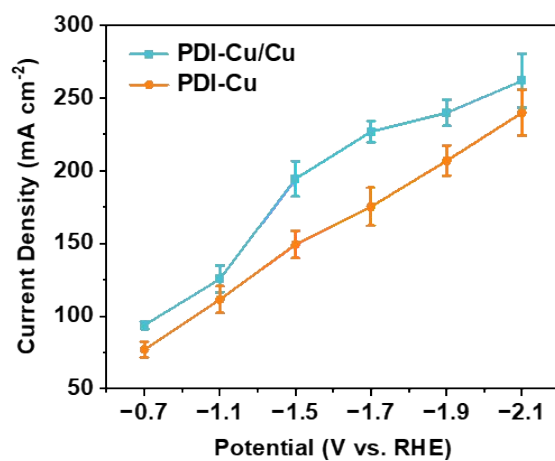

Figure S5. Total current densities of PDI-Cu/Cu and PDI/Cu.

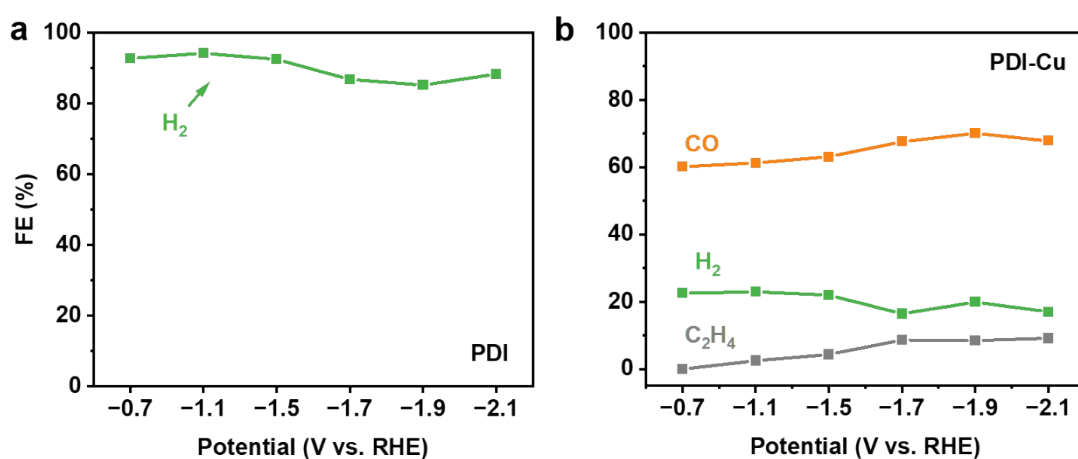

Figure S6. FEs of different products for (a) PDI and (b) PDI-Cu.

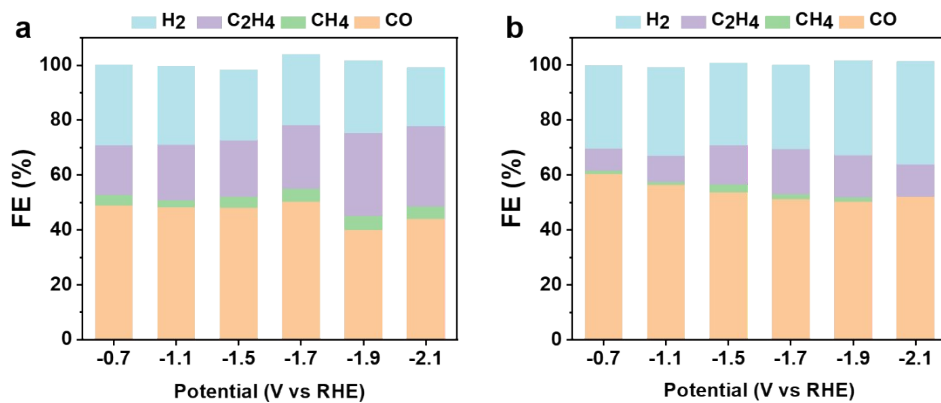

Figure S7. FEs of CO<sub>2</sub>RR products at different applied potentials (V vs. RHE) catalyzed by (a) PDI-Cu/Cu and (b) PDI/Cu.

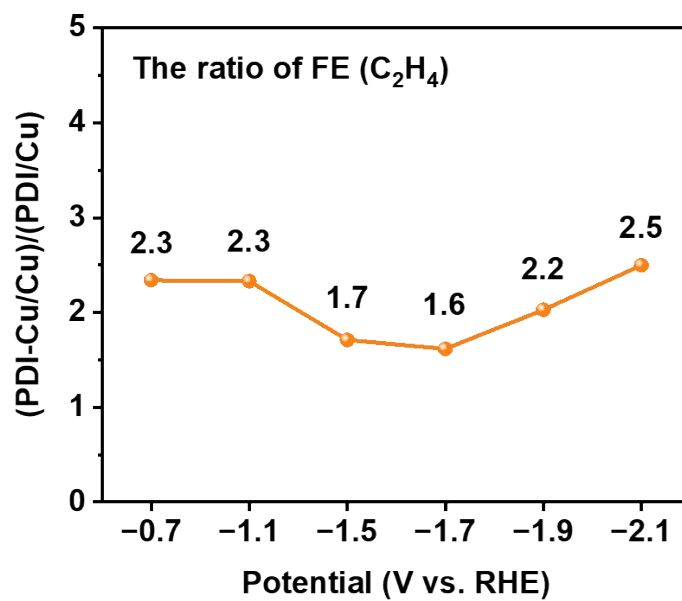

Figure S8. The FE (C<sub>2</sub>H<sub>4</sub>) ratio of PDI-Cu/Cu to PDI/Cu.

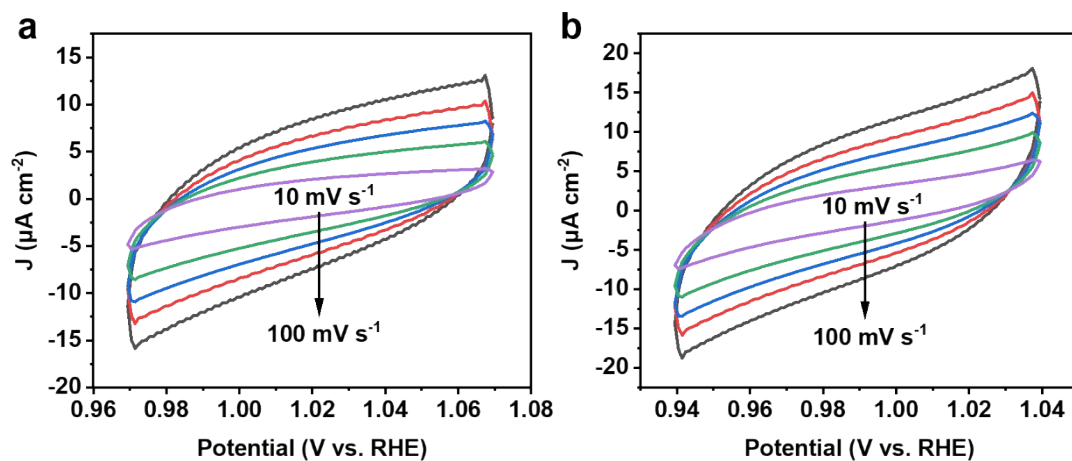

Figure S9. Typical cyclic voltammograms of (a) PDI-Cu/Cu and (b) PDI/Cu at different scan rate.

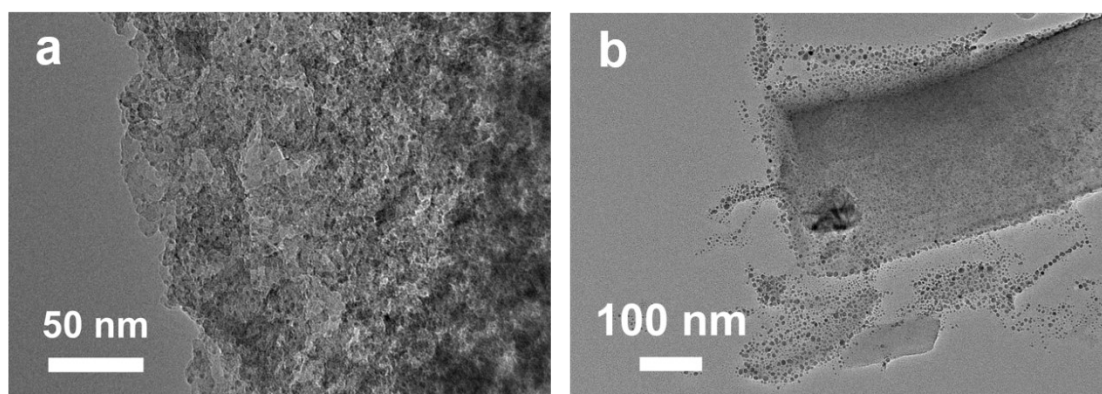

Figure S10. The TEM images of (a) PDI-Cu/Cu and (b) PDI/Cu after the electrochemical CO<sub>2</sub>RR.

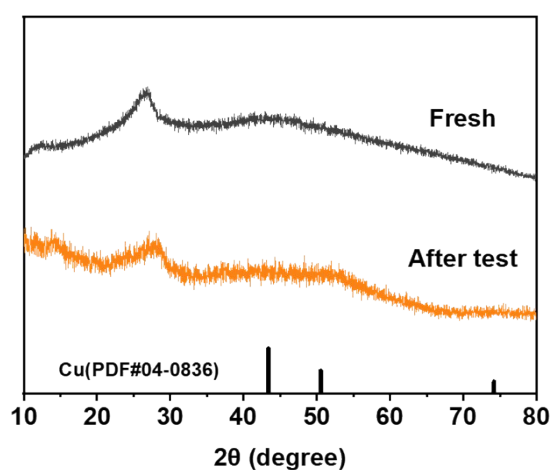

Figure S11. XRD patterns of before and after electrochemical CO<sub>2</sub>RR of PDI-Cu.

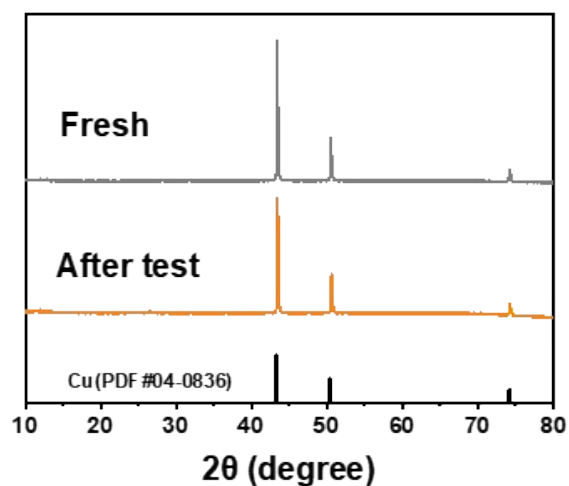

Figure S12. XRD patterns of before and after electrochemical CO<sub>2</sub>RR of PDI-Cu/Cu.

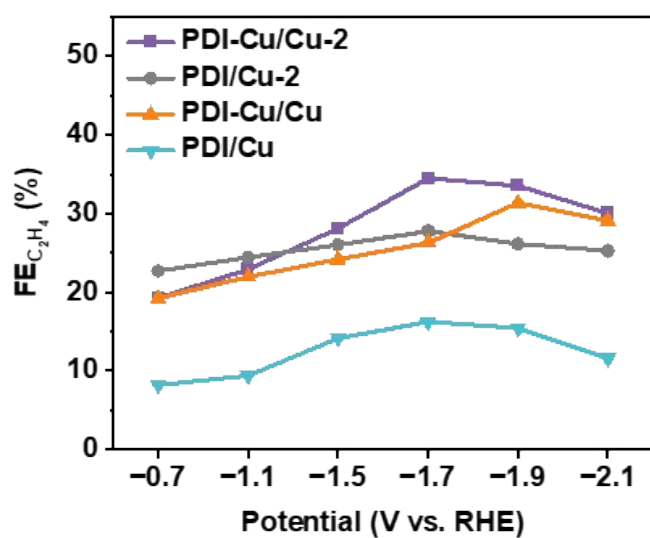

Figure S13. The FEs for C<sub>2</sub>H<sub>4</sub> conversion catalyzed by PDI-Cu/Cu, PDI-Cu, PDI-Cu/Cu-2 and PDI/Cu-2.

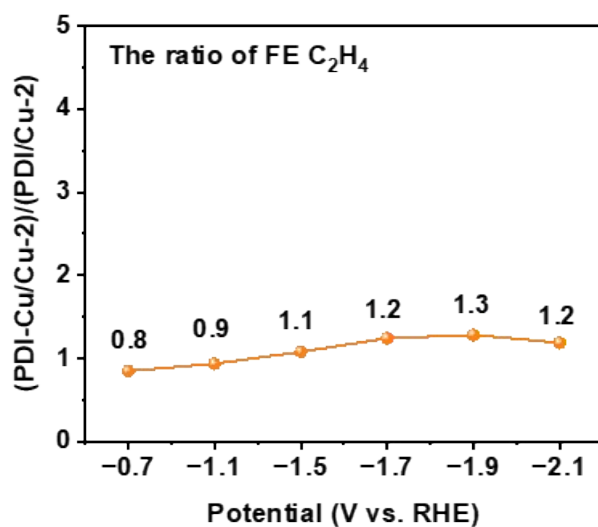

Figure S14. The FE ( $C_2H_4$ ) ratio of PDI-Cu/Cu-2 to PDI/Cu-2.

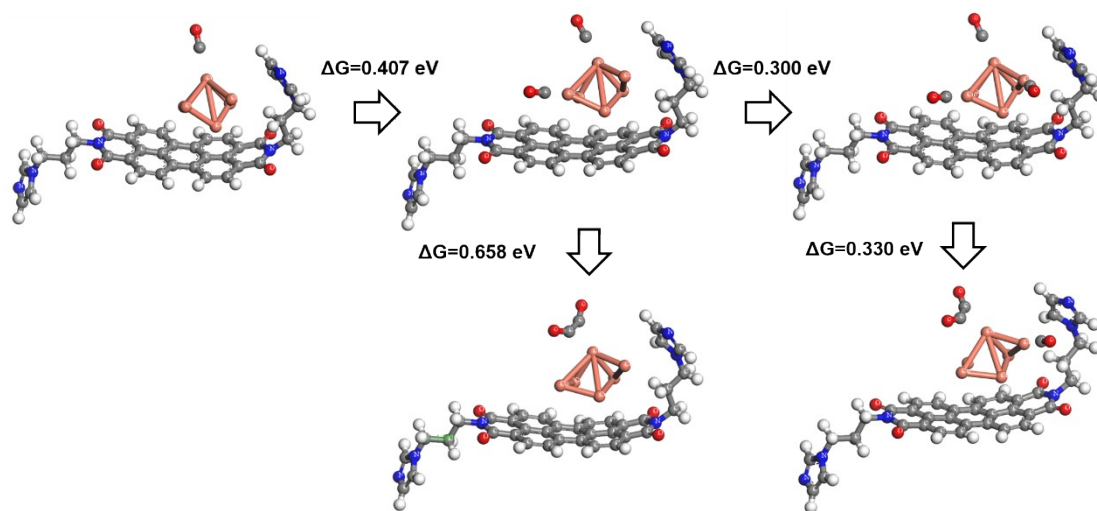

Figure S15. The complete structures of CO adsorption and C-C coupling on Cu clusters.

**Table S1.** The ICP results of the PDI-Cu, PDI-Cu/Cu and PDI/Cu samples.

|                     | <b>PDI-Cu</b> | <b>PDI-Cu/Cu</b> | <b>PDI/Cu</b> |
|---------------------|---------------|------------------|---------------|
| Content of Cu (wt%) | 7.70          | 46.3             | 40.2          |

**Table S2.** The EXAFS curve-fitting results of the PDI-Cu samples.

| <b>Sample</b> | <b>Path</b> | <b>CN</b>       | <b>R (Å)</b>      | <b><math>\sigma^2</math> (<math>10^{-3}</math> Å<sup>2</sup>)</b> |
|---------------|-------------|-----------------|-------------------|-------------------------------------------------------------------|
| PDI-Cu        | Cu-N        | 2.0( $\pm$ 0.2) | 1.95( $\pm$ 0.01) | 0.7( $\pm$ 0.1)                                                   |
|               | Cu-Cl       | 2.0( $\pm$ 0.1) | 2.30( $\pm$ 0.02) | 1.2( $\pm$ 0.1)                                                   |

**Table S3.** The ICP results of the PDI-Cu/Cu-2 and PDI/Cu-2 samples.

|                     | <b>PDI-Cu/Cu-2</b> | <b>PDI/Cu-2</b> |
|---------------------|--------------------|-----------------|
| Content of Cu (wt%) | 74.7               | 84.2            |
